# Supplementary material for: Two for One—Combined Morphologic and Quantitative Knee Joint MRI Using a Versatile Turbo Spin-Echo Platform
Source: MDPI journal article supplement (doi:10.3390/diagnostics14100978), 2024-05-08
Supplement: s1 [file s1]

## Supplementary Material

### Supplementary Figure S1

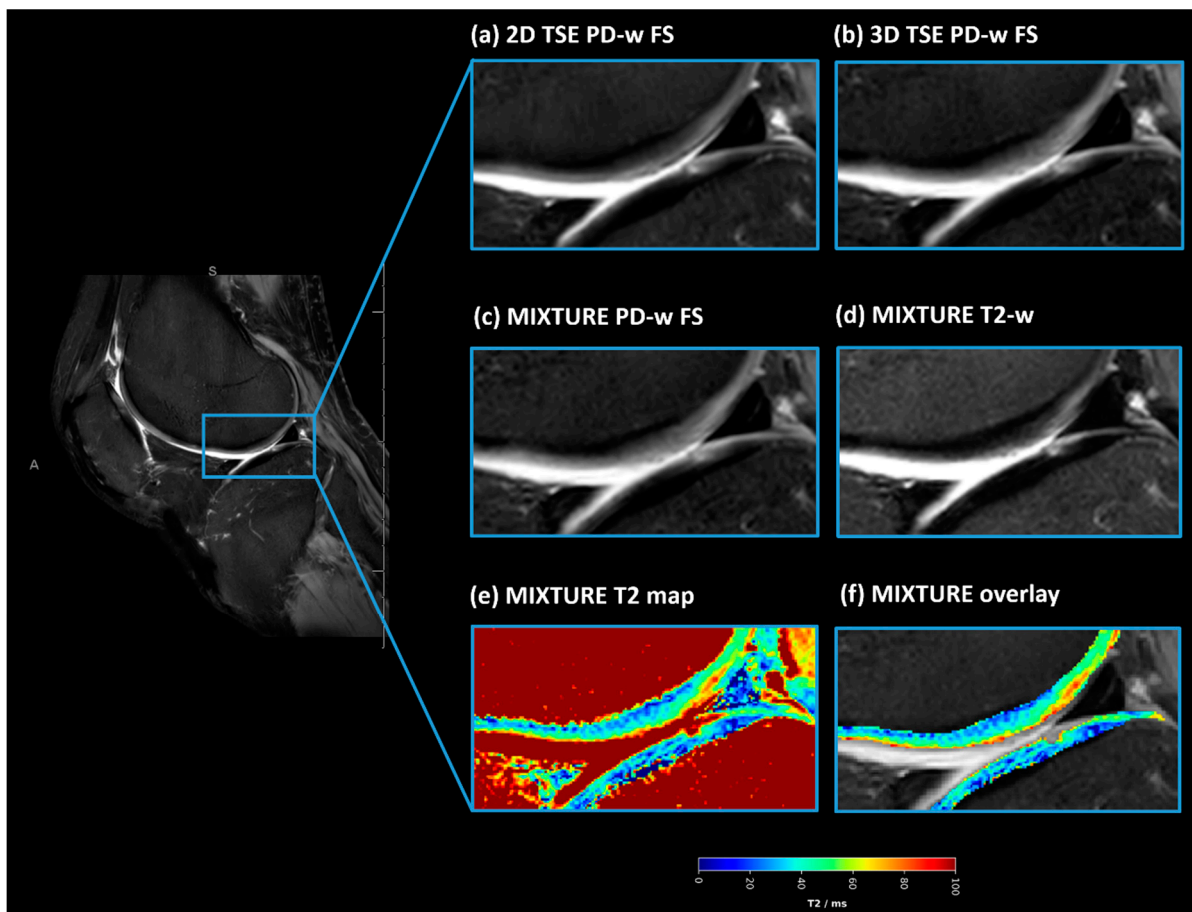

**Figure S1: Close-up of the central weight-bearing region (proton density-weighted fat-saturated MIXTURE and corresponding reference sequences).**

The blue box indicates the zoomed-in area. Figure organization, specimen, and slice as in **Figure 2**.

## Supplementary Figure S2

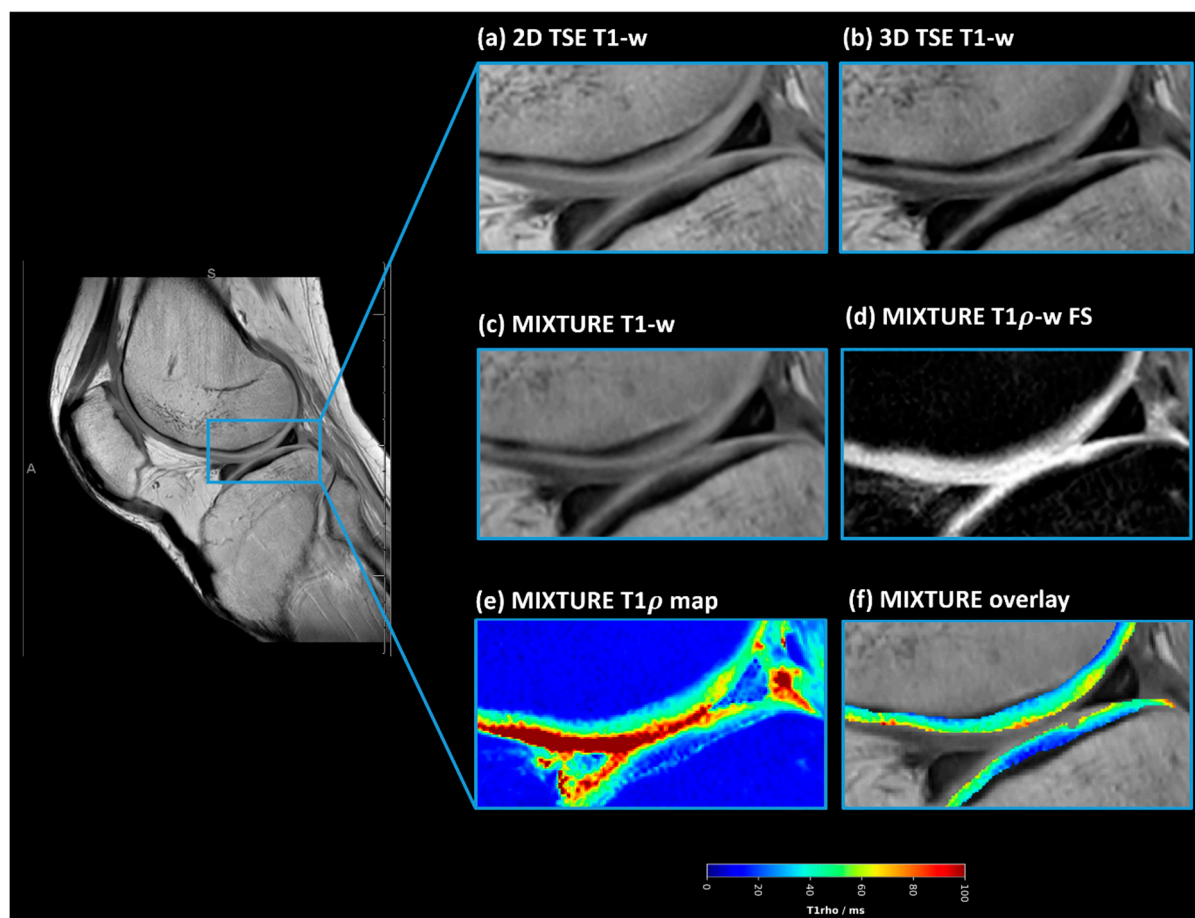

**Figure S2: Close-up of the central weight-bearing joint region (T1-weighted MIXTURE and reference sequences).**

The blue box indicates the zoomed-in area. Figure organization, specimen, and slice as in **Figure 4**.
